# Supplementary material for: The structure–property relationship of metallocene-based ethylene oligomerization catalysts using DFT and graph neural networks
Source: Royal Society of Chemistry journal article supplement (doi:10.1039/d4dt03065f), 2025-01-01
Supplement: d4dt03065f1.pdf [file d4dt03065f1.pdf]

# The Structure-Property Relationship of Metallocene-based Ethylene Oligomerization Catalysts Using DFT and Graph Neural Networks

Zhudan Chen <sup>1,†</sup>, Hao Li <sup>1,†</sup>, Xiaowei Xu <sup>1</sup>, ZhuoZheng Wang <sup>1</sup>, Yan Jiang <sup>2</sup>, Yi Luo <sup>1</sup>, Libo Wang <sup>2,\*</sup> and  
 Weisheng Yang <sup>1,\*</sup>

<sup>1</sup> PetroChina Petrochemical Research Institute, Beijing 102206, China; yangweisheng@petrochina.com.cn

<sup>2</sup> Daqing Petrochemical Research Center, Petrochemical Research Institute of PetroChina, Daqing 163714, China; wlb459@petrochina.com.cn

\* Correspondence: yangweisheng@petrochina.com.cn (W.Y.), wlb459@petrochina.com.cn (L.W.);

† These authors contributed equally to this work and should be considered as co-first authors.

**Table S1.** The relative energy of  $\text{TS}_{\text{tetra}}$   $\Delta G_{\text{ethylene-insertion}}$  and the relative energy of  $\text{TS}_{\text{tetra}}$ '  $\Delta G_{\text{ethylene-insertion}}$ ' responding to coordination-insertion occurred at the side of agnostic insertion and its opposite side for A1B1C9, A1B2C11, A1B7C9, A2B7C10, and A3B7C19.

| Index | ID      | 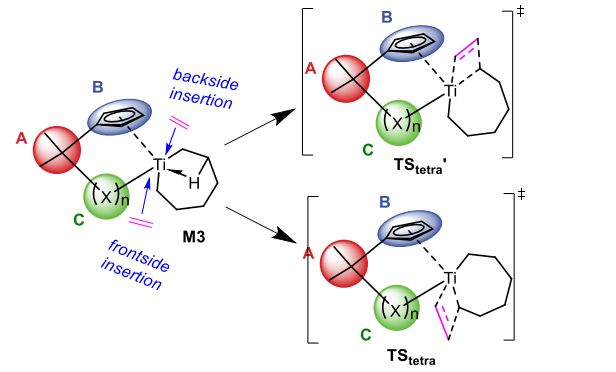 |                                                                                     |                                                                                     | The relative energy of $\text{TS}_{\text{tetra}}$ (frontside) $\Delta G_{\text{ethylene-insertion}}$ (kcal/mol) | The relative energy of $\text{TS}_{\text{tetra}}$ ' (backside) $\Delta G_{\text{ethylene-insertion}}$ ' (kcal/mol) |
|-------|---------|-------------------------------------------------------------------------------------|-------------------------------------------------------------------------------------|-------------------------------------------------------------------------------------|-----------------------------------------------------------------------------------------------------------------|--------------------------------------------------------------------------------------------------------------------|
|       |         | A                                                                                   | B                                                                                   | C                                                                                   |                                                                                                                 |                                                                                                                    |
| 1     | A1B1C9  |  |  |  | 3.62                                                                                                            | 6.52                                                                                                               |
| 2     | A1B2C11 |  |  |  | 9.06                                                                                                            | 14.04                                                                                                              |
| 3     | A1B7C9  |  |  |  | 2.34                                                                                                            | 7.87                                                                                                               |
| 4     | A2B7C10 |  |  |  | 9.21                                                                                                            | 10.07                                                                                                              |

|   |         |                                                                                   |                                                                                   |                                                                                   |      |       |
|---|---------|-----------------------------------------------------------------------------------|-----------------------------------------------------------------------------------|-----------------------------------------------------------------------------------|------|-------|
| 5 | A3B7C19 |  |  |  | 7.71 | 11.66 |
|---|---------|-----------------------------------------------------------------------------------|-----------------------------------------------------------------------------------|-----------------------------------------------------------------------------------|------|-------|

**Table S2.** The energy barrier difference  $\Delta\Delta G$  of the constructed 621 catalyst datasets.  $\Delta\Delta G$  equals the fourth ethylene insertion energy barrier  $\Delta G_{\text{ethylene insertion}}$  minus the  $\beta$ -hydrogen transfer (after the third ethylene insertion) energy barrier  $\Delta G_{\beta\text{-H transfer}}$ .

| Index | ID     | Substructures in 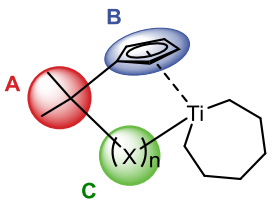 |                                                                                     |                                                                                       | the energy barrier difference $\Delta\Delta G$ (kcal/mol) |
|-------|--------|-----------------------------------------------------------------------------------------------------|-------------------------------------------------------------------------------------|---------------------------------------------------------------------------------------|-----------------------------------------------------------|
|       |        | A                                                                                                   | B                                                                                   | C                                                                                     |                                                           |
| 1     | A1B1C1 |                   |   |    | -0.818                                                    |
| 2     | A1B1C2 |                  |  |  | 0.548                                                     |
| 3     | A1B1C3 |                  |  |  | -1.037                                                    |
| 4     | A1B1C4 |                  |  |  | 6.745                                                     |
| 5     | A1B1C5 |                  |  |  | 2.358                                                     |
| 6     | A1B1C6 |                  |  |  | -17.536                                                   |
| 7     | A1B1C7 |                  |  |  | -16.112                                                   |
| 8     | A1B1C8 |                  |  |  | -14.625                                                   |
| 9     | A1B1C9 |                  |  |   | -16.781                                                   |

|    |         |                                                                                     |                                                                                     |                                                                                       |         |
|----|---------|-------------------------------------------------------------------------------------|-------------------------------------------------------------------------------------|---------------------------------------------------------------------------------------|---------|
| 10 | A1B1C10 |    |    |     | -17.462 |
| 11 | A1B1C11 |    |    |     | -15.674 |
| 12 | A1B1C12 |    |    |    | -3.245  |
| 13 | A1B1C13 |    |    |    | -0.801  |
| 14 | A1B1C14 |    |    |    | -2.253  |
| 15 | A1B1C15 |    |    |    | 18.125  |
| 16 | A1B1C16 |   |   |   | 19.815  |
| 17 | A1B1C17 |  |  |  | 17.353  |
| 18 | A1B1C18 |  |  |  | 2.44    |
| 19 | A1B1C19 |  |  |  | -7.406  |
| 20 | A1B1C20 |  |  |  | -16.109 |
| 21 | A1B1C21 |  |  |  | -9.506  |
| 22 | A1B1C22 |  |  |  | -4.965  |
| 23 | A1B1C23 |  |  |  | -4.951  |

|    |         |                                                                                     |                                                                                     |                                                                                       |         |
|----|---------|-------------------------------------------------------------------------------------|-------------------------------------------------------------------------------------|---------------------------------------------------------------------------------------|---------|
| 24 | A1B1C24 |    |    |    | 0.926   |
| 25 | A1B1C25 |    |    |    | 17.615  |
| 26 | A1B1C26 |    |    |    | -1.947  |
| 27 | A1B2C1  |    |    |    | 2.885   |
| 28 | A1B2C2  |    |    |    | 4.073   |
| 29 | A1B2C3  |  |   |  | 0.781   |
| 30 | A1B2C4  |  |  |  | 10.74   |
| 31 | A1B2C5  |  |  |  | 4.818   |
| 32 | A1B2C6  |  |  |  | -10.214 |
| 33 | A1B2C7  |  |  |  | -5.222  |
| 34 | A1B2C8  |  |  |  | -8.908  |
| 35 | A1B2C9  |  |  |   | -7.374  |
| 36 | A1B2C10 |  |  |   | -6.559  |

|    |         |                                                                                     |                                                                                     |                                                                                       |        |
|----|---------|-------------------------------------------------------------------------------------|-------------------------------------------------------------------------------------|---------------------------------------------------------------------------------------|--------|
| 37 | A1B2C11 |    |    |     | -6.098 |
| 38 | A1B2C12 |    |    |    | 0.98   |
| 39 | A1B2C13 |    |    |    | -0.566 |
| 40 | A1B2C14 |    |    |    | 1.856  |
| 41 | A1B2C15 |    |    |    | 21.298 |
| 42 | A1B2C16 |    |    |    | 22.814 |
| 43 | A1B2C17 |   |   |   | 20.905 |
| 44 | A1B2C18 |  |  |  | -0.676 |
| 45 | A1B2C19 |  |  |  | -2.472 |
| 46 | A1B2C20 |  |  |  | -8.114 |
| 47 | A1B2C21 |  |  |  | -5.082 |
| 48 | A1B2C22 |  |  |  | -0.986 |
| 49 | A1B2C23 |  |  |  | -0.83  |

|    |         |                                                                                     |                                                                                     |                                                                                       |         |
|----|---------|-------------------------------------------------------------------------------------|-------------------------------------------------------------------------------------|---------------------------------------------------------------------------------------|---------|
| 50 | A1B2C24 |    |    |    | 4.622   |
| 51 | A1B2C25 |    |    |    | 20.779  |
| 52 | A1B2C26 |    |    |    | 0.707   |
| 53 | A1B3C1  |    |    |    | -2.658  |
| 54 | A1B3C2  |   |   |   | -1.396  |
| 55 | A1B3C3  |  |  |  | -2.126  |
| 56 | A1B3C4  |  |  |  | 5.737   |
| 57 | A1B3C5  |  |  |  | 0.011   |
| 58 | A1B3C6  |  |  |  | -13.839 |
| 59 | A1B3C7  |  |  |  | -15.764 |

|    |         |                                                                                     |                                                                                     |                                                                                       |         |
|----|---------|-------------------------------------------------------------------------------------|-------------------------------------------------------------------------------------|---------------------------------------------------------------------------------------|---------|
| 60 | A1B3C8  |    |    |    | -18.805 |
| 61 | A1B3C9  |    |    |     | -14.121 |
| 62 | A1B3C10 |    |    |     | -13.325 |
| 63 | A1B3C11 |    |    |     | -12.661 |
| 64 | A1B3C12 |    |   |    | -5.505  |
| 65 | A1B3C13 |  |  |  | -4.185  |
| 66 | A1B3C14 |  |  |  | -4.744  |
| 67 | A1B3C15 |  |  |  | 14.875  |
| 68 | A1B3C16 |  |  |  | 16.571  |
| 69 | A1B3C17 |  |  |  | 14.396  |
| 70 | A1B3C18 |  |  |  | -7.809  |

|    |         |                                                                                     |                                                                                     |                                                                                       |         |
|----|---------|-------------------------------------------------------------------------------------|-------------------------------------------------------------------------------------|---------------------------------------------------------------------------------------|---------|
| 71 | A1B3C19 |    |    |    | -9.824  |
| 72 | A1B3C20 |    |    |    | -18.113 |
| 73 | A1B3C21 |    |    |    | -11.783 |
| 74 | A1B3C22 |    |    |    | -7.661  |
| 75 | A1B3C23 |    |   |   | -7.604  |
| 76 | A1B3C24 |  |  |  | -1.653  |
| 77 | A1B3C25 |  |  |  | 14.405  |
| 78 | A1B3C26 |  |  |  | -5.604  |
| 79 | A1B4C1  |  |  |  | 5.367   |
| 80 | A1B4C2  |  |  |  | 5.934   |
| 81 | A1B4C3  |  |  |  | 4.169   |



|    |         |                                                                                     |                                                                                     |                                                                                       |        |
|----|---------|-------------------------------------------------------------------------------------|-------------------------------------------------------------------------------------|---------------------------------------------------------------------------------------|--------|
| 82 | A1B4C4  |    |    |    | 13.546 |
| 83 | A1B4C5  |    |    |    | 5.351  |
| 84 | A1B4C6  |    |    |    | -2.525 |
| 85 | A1B4C7  |    |    |    | -11.63 |
| 86 | A1B4C8  |    |    |    | -10.15 |
| 87 | A1B4C9  |    |    |    | -1.921 |
| 88 | A1B4C10 |   |   |   | -8.522 |
| 89 | A1B4C11 |  |  |  | -0.39  |
| 90 | A1B4C12 |  |  |  | 4.276  |
| 91 | A1B4C13 |  |  |  | -0.867 |
| 92 | A1B4C14 |  |  |  | 3.98   |
| 93 | A1B4C15 |  |  |  | 17.873 |
| 94 | A1B4C16 |  |  |  | 18.997 |
| 95 | A1B4C17 |  |  |  | 17.833 |

|     |         |                                                                                     |                                                                                     |                                                                                       |        |
|-----|---------|-------------------------------------------------------------------------------------|-------------------------------------------------------------------------------------|---------------------------------------------------------------------------------------|--------|
| 96  | A1B4C18 |    |    |    | 1.33   |
| 97  | A1B4C19 |    |    |    | -2.79  |
| 98  | A1B4C20 |    |    |    | -4.163 |
| 99  | A1B4C21 |    |    |    | -1.101 |
| 100 | A1B4C22 |    |    |    | 1.507  |
| 101 | A1B4C23 |    |    |   | -3.747 |
| 102 | A1B4C24 |  |  |  | 6.181  |
| 103 | A1B4C25 |  |  |  | 16.623 |
| 104 | A1B4C26 |  |  |  | 2.579  |
| 105 | A1B5C1  |  |  |  | 1.111  |
| 106 | A1B5C2  |  |  |  | 2.109  |

|     |         |                                                                                     |                                                                                     |                                                                                       |        |
|-----|---------|-------------------------------------------------------------------------------------|-------------------------------------------------------------------------------------|---------------------------------------------------------------------------------------|--------|
| 107 | A1B5C3  |    |    |    | 1.048  |
| 108 | A1B5C4  |    |    |    | 8.941  |
| 109 | A1B5C5  |    |    |    | 2.719  |
| 110 | A1B5C6  |    |   |    | -6.36  |
| 111 | A1B5C7  |  |  |  | -7.917 |
| 112 | A1B5C8  |  |  |  | -13.9  |
| 113 | A1B5C9  |  |  |   | -6.022 |
| 114 | A1B5C10 |  |  |   | -5.971 |

|     |         |                                                                                     |                                                                                     |                                                                                       |        |
|-----|---------|-------------------------------------------------------------------------------------|-------------------------------------------------------------------------------------|---------------------------------------------------------------------------------------|--------|
| 115 | A1B5C11 |    |    |     | -4.479 |
| 116 | A1B5C12 |    |    |    | 0.585  |
| 117 | A1B5C13 |    |    |    | -1.812 |
| 118 | A1B5C14 |    |    |    | 0.959  |
| 119 | A1B5C15 |  |  |  | 18.955 |
| 120 | A1B5C16 |  |  |  | 20.134 |
| 121 | A1B5C17 |  |  |  | 17.735 |
| 122 | A1B5C18 |  |  |  | -6.632 |

|     |         |                                                                                     |                                                                                     |                                                                                       |         |
|-----|---------|-------------------------------------------------------------------------------------|-------------------------------------------------------------------------------------|---------------------------------------------------------------------------------------|---------|
| 123 | A1B5C19 |    |    |    | -8.055  |
| 124 | A1B5C20 |    |    |    | -13.698 |
| 125 | A1B5C21 |    |    |    | -10.114 |
| 126 | A1B5C22 |    |   |    | -2.689  |
| 127 | A1B5C23 |  |  |  | -0.298  |
| 128 | A1B5C24 |  |  |  | 2.57    |
| 129 | A1B5C25 |  |  |  | 18.683  |
| 130 | A1B5C26 |  |  |  | 0.504   |
| 131 | A1B6C1  |  |  |  | -0.705  |

|     |         |                                                                                     |                                                                                     |                                                                                       |         |
|-----|---------|-------------------------------------------------------------------------------------|-------------------------------------------------------------------------------------|---------------------------------------------------------------------------------------|---------|
| 132 | A1B6C2  |    |    |    | 0.724   |
| 133 | A1B6C3  |    |    |    | -1.168  |
| 134 | A1B6C4  |    |    |    | 7.807   |
| 135 | A1B6C5  |    |    |    | 3.052   |
| 136 | A1B6C6  |    |   |    | -16.436 |
| 137 | A1B6C7  |  |  |  | -16.541 |
| 138 | A1B6C8  |  |  |  | -16.028 |
| 139 | A1B6C9  |  |  |   | -17.457 |
| 140 | A1B6C10 |  |  |   | -12.095 |
| 141 | A1B6C11 |  |  |   | -15.767 |
| 142 | A1B6C12 |  |  |  | -4.187  |

|     |         |                                                                                     |                                                                                     |                                                                                       |         |
|-----|---------|-------------------------------------------------------------------------------------|-------------------------------------------------------------------------------------|---------------------------------------------------------------------------------------|---------|
| 143 | A1B6C13 |    |    |    | -0.447  |
| 144 | A1B6C14 |    |    |    | -3.119  |
| 145 | A1B6C15 |    |    |    | 14.266  |
| 146 | A1B6C16 |    |    |    | 15.524  |
| 147 | A1B6C17 |    |   |    | 13.354  |
| 148 | A1B6C18 |  |  |  | -5.761  |
| 149 | A1B6C19 |  |  |  | -7.911  |
| 150 | A1B6C20 |  |  |  | -16.611 |
| 151 | A1B6C21 |  |  |  | -10.262 |
| 152 | A1B6C22 |  |  |  | -5.373  |
| 153 | A1B6C23 |  |  |  | -5.132  |

|     |         |                                                                                     |                                                                                     |                                                                                       |         |
|-----|---------|-------------------------------------------------------------------------------------|-------------------------------------------------------------------------------------|---------------------------------------------------------------------------------------|---------|
| 154 | A1B6C24 |    |    |    | 0.96    |
| 155 | A1B6C25 |    |    |    | 15.35   |
| 156 | A1B6C26 |    |    |    | -1.591  |
| 157 | A1B7C1  |    |    |    | 0.19    |
| 158 | A1B7C2  |   |   |   | 1.451   |
| 159 | A1B7C3  |  |  |  | -1.106  |
| 160 | A1B7C4  |  |  |  | 7.669   |
| 161 | A1B7C5  |  |  |  | 2.925   |
| 162 | A1B7C6  |  |  |  | -13.433 |
| 163 | A1B7C7  |  |  |  | -16.197 |



|     |         |                                                                                     |                                                                                     |                                                                                       |         |
|-----|---------|-------------------------------------------------------------------------------------|-------------------------------------------------------------------------------------|---------------------------------------------------------------------------------------|---------|
| 164 | A1B7C8  |    |    |    | -16.601 |
| 165 | A1B7C9  |    |    |     | -12.517 |
| 166 | A1B7C10 |    |    |     | -11.761 |
| 167 | A1B7C11 |    |    |     | -11.197 |
| 168 | A1B7C12 |   |   |   | -3.752  |
| 169 | A1B7C13 |  |  |  | -1.08   |
| 170 | A1B7C14 |  |  |  | -2.77   |
| 171 | A1B7C15 |  |  |  | 14.986  |
| 172 | A1B7C16 |  |  |  | 16.28   |
| 173 | A1B7C17 |  |  |  | 14.118  |
| 174 | A1B7C18 |  |  |  | -5.542  |

|     |         |                                                                                     |                                                                                     |                                                                                       |         |
|-----|---------|-------------------------------------------------------------------------------------|-------------------------------------------------------------------------------------|---------------------------------------------------------------------------------------|---------|
| 175 | A1B7C19 |    |    |    | -7.717  |
| 176 | A1B7C20 |    |    |    | -16.059 |
| 177 | A1B7C21 |    |    |    | -10.015 |
| 178 | A1B7C22 |    |    |    | -5.483  |
| 179 | A1B7C23 |    |   |   | -5.39   |
| 180 | A1B7C24 |  |  |  | 0.583   |
| 181 | A1B7C25 |  |  |  | 15.725  |
| 182 | A1B7C26 |  |  |  | -1.428  |
| 183 | A1B8C1  |  |  |  | 0.636   |
| 184 | A1B8C2  |  |  |  | 1.857   |

|     |         |                                                                                     |                                                                                     |                                                                                       |         |
|-----|---------|-------------------------------------------------------------------------------------|-------------------------------------------------------------------------------------|---------------------------------------------------------------------------------------|---------|
| 185 | A1B8C3  |    |    |    | -0.23   |
| 186 | A1B8C4  |    |    |    | 9.209   |
| 187 | A1B8C5  |    |    |    | 2.923   |
| 188 | A1B8C6  |    |    |    | -11.443 |
| 189 | A1B8C7  |    |   |    | -14.814 |
| 190 | A1B8C8  |  |  |  | -16.902 |
| 191 | A1B8C9  |  |  |   | -11.399 |
| 192 | A1B8C10 |  |  |   | -10.68  |
| 193 | A1B8C11 |  |  |   | -10.017 |
| 194 | A1B8C12 |  |  |  | -3.396  |
| 195 | A1B8C13 |  |  |  | -1.564  |

|     |         |                                                                                     |                                                                                     |                                                                                       |         |
|-----|---------|-------------------------------------------------------------------------------------|-------------------------------------------------------------------------------------|---------------------------------------------------------------------------------------|---------|
| 196 | A1B8C14 |    |    |    | -2.511  |
| 197 | A1B8C15 |    |    |    | 16.072  |
| 198 | A1B8C16 |    |    |    | 17.586  |
| 199 | A1B8C17 |    |    |    | 15.493  |
| 200 | A1B8C18 |    |   |    | -5.228  |
| 201 | A1B8C19 |  |  |  | -7.174  |
| 202 | A1B8C20 |  |  |  | -14.924 |
| 203 | A1B8C21 |  |  |  | -9.277  |
| 204 | A1B8C22 |  |  |  | -5.316  |
| 205 | A1B8C23 |  |  |  | -5.256  |
| 206 | A1B8C24 |  |  |  | 0.508   |

|     |         |                                                                                     |                                                                                     |                                                                                       |         |
|-----|---------|-------------------------------------------------------------------------------------|-------------------------------------------------------------------------------------|---------------------------------------------------------------------------------------|---------|
| 207 | A1B8C25 |    |    |    | 16.677  |
| 208 | A2B1C1  |    |    |    | 4.701   |
| 209 | A2B1C2  |    |    |    | 7.521   |
| 210 | A2B1C3  |    |    |    | 3.491   |
| 211 | A2B1C4  |    |    |    | 12.41   |
| 212 | A2B1C5  |   |   |   | 8.394   |
| 213 | A2B1C6  |  |  |  | -10.301 |
| 214 | A2B1C7  |  |  |  | -13.005 |
| 215 | A2B1C8  |  |  |  | -3.549  |
| 216 | A2B1C9  |  |  |   | -11.33  |
| 217 | A2B1C10 |  |  |   | -11.688 |
| 218 | A2B1C11 |  |  |   | -10.068 |
| 219 | A2B1C12 |  |  |  | 0.693   |
| 220 | A2B1C13 |  |  |  | 3.962   |

|     |         |                                                                                     |                                                                                     |                                                                                       |        |
|-----|---------|-------------------------------------------------------------------------------------|-------------------------------------------------------------------------------------|---------------------------------------------------------------------------------------|--------|
| 221 | A2B1C14 |    |    |    | 1.963  |
| 222 | A2B1C15 |    |    |    | 17.674 |
| 223 | A2B1C16 |    |    |    | 19.102 |
| 224 | A2B1C17 |    |    |    | 16.735 |
| 225 | A2B1C18 |    |    |    | 5.574  |
| 226 | A2B1C19 |    |    |    | -2.394 |
| 227 | A2B1C20 |   |   |   | -9.74  |
| 228 | A2B1C21 |  |  |  | -4.763 |
| 229 | A2B1C22 |  |  |  | -0.139 |
| 230 | A2B1C23 |  |  |  | -0.1   |
| 231 | A2B1C24 |  |  |  | 5.808  |
| 232 | A2B1C25 |  |  |  | 21.234 |

|     |         |                                                                                     |                                                                                     |                                                                                       |        |
|-----|---------|-------------------------------------------------------------------------------------|-------------------------------------------------------------------------------------|---------------------------------------------------------------------------------------|--------|
| 233 | A2B1C26 |    |    |    | 2.63   |
| 234 | A2B2C1  |    |    |    | 5.522  |
| 235 | A2B2C2  |    |    |    | 8.279  |
| 236 | A2B2C3  |    |    |    | 3.656  |
| 237 | A2B2C4  |    |    |    | 11.699 |
| 238 | A2B2C5  |   |   |    | 8.052  |
| 239 | A2B2C6  |  |  |  | -6.613 |
| 240 | A2B2C7  |  |  |  | -3.943 |
| 241 | A2B2C8  |  |  |  | -1.431 |
| 242 | A2B2C9  |  |  |   | -5.289 |
| 243 | A2B2C10 |  |  |   | -4.568 |
| 244 | A2B2C11 |  |  |   | -3.965 |
| 245 | A2B2C12 |  |  |  | 2.803  |
| 246 | A2B2C13 |  |  |  | 2.046  |

|     |         |                                                                                     |                                                                                     |                                                                                       |        |
|-----|---------|-------------------------------------------------------------------------------------|-------------------------------------------------------------------------------------|---------------------------------------------------------------------------------------|--------|
| 247 | A2B2C14 |    |    |    | 3.94   |
| 248 | A2B2C15 |    |    |    | 20.023 |
| 249 | A2B2C16 |    |    |    | 21.581 |
| 250 | A2B2C17 |    |    |    | 19.547 |
| 251 | A2B2C18 |    |    |    | 2.297  |
| 252 | A2B2C19 |    |    |    | 0.462  |
| 253 | A2B2C20 |   |   |   | -2.901 |
| 254 | A2B2C21 |  |  |  | -0.555 |
| 255 | A2B2C22 |  |  |  | 1.087  |
| 256 | A2B2C23 |  |  |  | 1.678  |
| 257 | A2B2C24 |  |  |  | 6.852  |
| 258 | A2B2C25 |  |  |  | 21.46  |



|     |         |                                                                                     |                                                                                     |                                                                                       |         |
|-----|---------|-------------------------------------------------------------------------------------|-------------------------------------------------------------------------------------|---------------------------------------------------------------------------------------|---------|
| 259 | A2B2C26 |    |    |    | 2.679   |
| 260 | A2B3C1  |    |    |    | 2.846   |
| 261 | A2B3C2  |    |    |    | 5.284   |
| 262 | A2B3C3  |    |    |    | 2.924   |
| 263 | A2B3C4  |   |   |   | 10.944  |
| 264 | A2B3C5  |  |  |  | 5.939   |
| 265 | A2B3C6  |  |  |  | -11.528 |
| 266 | A2B3C7  |  |  |  | -12.833 |
| 267 | A2B3C8  |  |  |  | -8.043  |
| 268 | A2B3C9  |  |  |   | -13.376 |

|     |         |                                                                                     |                                                                                     |                                                                                       |         |
|-----|---------|-------------------------------------------------------------------------------------|-------------------------------------------------------------------------------------|---------------------------------------------------------------------------------------|---------|
| 269 | A2B3C10 |    |    |     | -8.654  |
| 270 | A2B3C11 |    |    |     | -12.159 |
| 271 | A2B3C12 |    |    |    | -0.625  |
| 272 | A2B3C13 |    |    |    | 1.535   |
| 273 | A2B3C14 |    |   |    | -0.044  |
| 274 | A2B3C15 |  |  |  | 14.716  |
| 275 | A2B3C16 |  |  |  | 16.168  |
| 276 | A2B3C17 |  |  |  | 13.923  |
| 277 | A2B3C18 |  |  |  | -2.428  |
| 278 | A2B3C19 |  |  |  | -4.381  |
| 279 | A2B3C20 |  |  |  | -11.673 |

|     |         |                                                                                     |                                                                                     |                                                                                       |        |
|-----|---------|-------------------------------------------------------------------------------------|-------------------------------------------------------------------------------------|---------------------------------------------------------------------------------------|--------|
| 280 | A2B3C21 |    |    |    | -6.185 |
| 281 | A2B3C22 |    |    |    | -2.199 |
| 282 | A2B3C23 |    |    |    | -2.242 |
| 283 | A2B3C24 |    |    |    | 3.562  |
| 284 | A2B3C25 |    |   |   | 18.546 |
| 285 | A2B3C26 |  |  |  | -0.661 |
| 286 | A2B4C1  |  |  |  | 5.798  |
| 287 | A2B4C2  |  |  |  | 8.646  |
| 288 | A2B4C3  |  |  |  | 7.396  |
| 289 | A2B4C4  |  |  |  | 13.857 |
| 290 | A2B4C5  |  |  |  | 7.485  |
| 291 | A2B4C6  |  |  |  | 0.838  |

|     |         |                                                                                     |                                                                                     |                                                                                       |        |
|-----|---------|-------------------------------------------------------------------------------------|-------------------------------------------------------------------------------------|---------------------------------------------------------------------------------------|--------|
| 292 | A2B4C7  |    |    |    | -4.925 |
| 293 | A2B4C8  |    |    |    | -6.825 |
| 294 | A2B4C9  |    |    |     | 0.8    |
| 295 | A2B4C10 |    |    |     | 1.997  |
| 296 | A2B4C11 |    |    |     | 2.322  |
| 297 | A2B4C12 |    |    |    | 4.335  |
| 298 | A2B4C13 |  |  |  | 0.171  |
| 299 | A2B4C14 |  |  |  | 5.028  |
| 300 | A2B4C15 |  |  |  | 15.693 |
| 301 | A2B4C16 |  |  |  | 16.646 |
| 302 | A2B4C17 |  |  |  | 15.472 |
| 303 | A2B4C18 |  |  |  | 3.889  |
| 304 | A2B4C19 |  |  |  | 2.497  |
| 305 | A2B4C20 |  |  |  | -0.723 |

|     |         |                                                                                     |                                                                                     |                                                                                       |        |
|-----|---------|-------------------------------------------------------------------------------------|-------------------------------------------------------------------------------------|---------------------------------------------------------------------------------------|--------|
| 306 | A2B4C21 |    |    |    | 1.855  |
| 307 | A2B4C22 |    |    |    | 3.163  |
| 308 | A2B4C23 |    |    |    | 4.046  |
| 309 | A2B4C24 |    |    |    | 8.456  |
| 310 | A2B4C25 |    |    |    | 14.248 |
| 311 | A2B4C26 |  |  |  | 4.179  |
| 312 | A2B5C1  |  |  |  | 3.122  |
| 313 | A2B5C2  |  |  |  | 4.884  |
| 314 | A2B5C3  |  |  |  | 1.344  |
| 315 | A2B5C4  |  |  |  | 8.362  |

|     |         |                                                                                     |                                                                                     |                                                                                       |         |
|-----|---------|-------------------------------------------------------------------------------------|-------------------------------------------------------------------------------------|---------------------------------------------------------------------------------------|---------|
| 316 | A2B5C5  |    |    |    | 2.354   |
| 317 | A2B5C6  |    |    |    | -5.833  |
| 318 | A2B5C7  |    |    |    | -11.278 |
| 319 | A2B5C8  |    |   |    | -8.413  |
| 320 | A2B5C9  |  |  |   | -4.111  |
| 321 | A2B5C10 |  |  |   | -4.152  |
| 322 | A2B5C11 |  |  |   | -2.828  |
| 323 | A2B5C12 |  |  |  | 1.206   |

|     |         |                                                                                     |                                                                                     |                                                                                       |        |
|-----|---------|-------------------------------------------------------------------------------------|-------------------------------------------------------------------------------------|---------------------------------------------------------------------------------------|--------|
| 324 | A2B5C13 |    |    |    | -1.867 |
| 325 | A2B5C14 |    |    |    | 1.846  |
| 326 | A2B5C15 |    |    |    | 18.816 |
| 327 | A2B5C16 |    |   |    | 19.795 |
| 328 | A2B5C17 |  |  |  | 18.127 |
| 329 | A2B5C18 |  |  |  | 0.381  |
| 330 | A2B5C19 |  |  |  | -1.38  |
| 331 | A2B5C20 |  |  |  | 2.322  |

|     |         |                                                                                     |                                                                                     |                                                                                       |        |
|-----|---------|-------------------------------------------------------------------------------------|-------------------------------------------------------------------------------------|---------------------------------------------------------------------------------------|--------|
| 332 | A2B5C21 |    |    |    | -2.038 |
| 333 | A2B5C22 |    |    |    | -1.045 |
| 334 | A2B5C23 |    |    |    | -0.49  |
| 335 | A2B5C24 |    |   |   | 3.663  |
| 336 | A2B5C25 |  |  |  | 20.565 |
| 337 | A2B5C26 |  |  |  | 0.074  |
| 338 | A2B6C1  |  |  |  | 4.94   |
| 339 | A2B6C2  |  |  |  | 8.089  |
| 340 | A2B6C3  |  |  |  | 3.954  |



|     |         |                                                                                     |                                                                                     |                                                                                       |         |
|-----|---------|-------------------------------------------------------------------------------------|-------------------------------------------------------------------------------------|---------------------------------------------------------------------------------------|---------|
| 341 | A2B6C4  |    |    |    | 13.592  |
| 342 | A2B6C5  |    |    |    | 9.714   |
| 343 | A2B6C6  |    |    |    | -10.713 |
| 344 | A2B6C7  |    |    |    | -11.808 |
| 345 | A2B6C8  |    |   |    | -4.927  |
| 346 | A2B6C9  |  |  |   | -11.633 |
| 347 | A2B6C10 |  |  |   | -11.704 |
| 348 | A2B6C11 |  |  |   | -10.447 |
| 349 | A2B6C12 |  |  |  | 1.107   |
| 350 | A2B6C13 |  |  |  | 5.725   |
| 351 | A2B6C14 |  |  |  | 2.351   |

|     |         |                                                                                     |                                                                                     |                                                                                       |         |
|-----|---------|-------------------------------------------------------------------------------------|-------------------------------------------------------------------------------------|---------------------------------------------------------------------------------------|---------|
| 352 | A2B6C15 |    |    |    | 13.505  |
| 353 | A2B6C16 |    |    |    | 14.835  |
| 354 | A2B6C17 |    |    |    | 12.614  |
| 355 | A2B6C18 |    |    |    | 0.412   |
| 356 | A2B6C19 |    |   |    | -1.996  |
| 357 | A2B6C20 |  |  |  | -10.437 |
| 358 | A2B6C21 |  |  |  | -4.725  |
| 359 | A2B6C22 |  |  |  | 0.397   |
| 360 | A2B6C23 |  |  |  | 0.421   |
| 361 | A2B6C24 |  |  |  | 6.316   |
| 362 | A2B6C25 |  |  |  | 16.025  |

|     |         |                                                                                     |                                                                                     |                                                                                       |         |
|-----|---------|-------------------------------------------------------------------------------------|-------------------------------------------------------------------------------------|---------------------------------------------------------------------------------------|---------|
| 363 | A2B6C26 |    |    |    | 3.747   |
| 364 | A2B7C1  |    |    |    | 5.699   |
| 365 | A2B7C2  |    |    |    | 8.591   |
| 366 | A2B7C3  |    |    |    | 3.95    |
| 367 | A2B7C4  |   |   |   | 13.219  |
| 368 | A2B7C5  |  |  |  | 9.384   |
| 369 | A2B7C6  |  |  |  | -9.802  |
| 370 | A2B7C8  |  |  |  | -5.767  |
| 371 | A2B7C9  |  |  |   | -10.733 |
| 372 | A2B7C10 |  |  |   | -11.289 |

|     |         |                                                                                     |                                                                                     |                                                                                       |        |
|-----|---------|-------------------------------------------------------------------------------------|-------------------------------------------------------------------------------------|---------------------------------------------------------------------------------------|--------|
| 373 | A2B7C11 |    |    |     | -9.553 |
| 374 | A2B7C12 |    |    |    | 1.021  |
| 375 | A2B7C13 |    |    |    | 4.701  |
| 376 | A2B7C14 |    |    |    | 2.172  |
| 377 | A2B7C15 |    |   |    | 14.219 |
| 378 | A2B7C16 |  |  |  | 15.825 |
| 379 | A2B7C17 |  |  |  | 13.412 |
| 380 | A2B7C18 |  |  |  | 0.384  |
| 381 | A2B7C19 |  |  |  | -2.065 |
| 382 | A2B7C20 |  |  |  | -9.614 |
| 383 | A2B7C21 |  |  |  | -4.619 |

|     |         |                                                                                     |                                                                                     |                                                                                       |        |
|-----|---------|-------------------------------------------------------------------------------------|-------------------------------------------------------------------------------------|---------------------------------------------------------------------------------------|--------|
| 384 | A2B7C22 |    |    |    | 0.39   |
| 385 | A2B7C23 |    |    |    | 0.599  |
| 386 | A2B7C24 |    |    |    | 6.16   |
| 387 | A2B7C25 |    |    |    | 16.812 |
| 388 | A2B7C26 |    |   |   | 3.997  |
| 389 | A2B8C1  |  |  |  | 6.36   |
| 390 | A2B8C2  |  |  |  | 8.855  |
| 391 | A2B8C3  |  |  |  | 4.688  |
| 392 | A2B8C4  |  |  |  | 14.956 |
| 393 | A2B8C5  |  |  |  | 9.098  |

|     |         |                                                                                     |                                                                                     |                                                                                       |         |
|-----|---------|-------------------------------------------------------------------------------------|-------------------------------------------------------------------------------------|---------------------------------------------------------------------------------------|---------|
| 394 | A2B8C6  |    |    |    | -8.953  |
| 395 | A2B8C7  |    |    |    | -11.098 |
| 396 | A2B8C8  |    |    |    | -6.157  |
| 397 | A2B8C9  |    |    |     | -6.239  |
| 398 | A2B8C10 |    |   |     | -5.014  |
| 399 | A2B8C11 |  |  |   | -4.811  |
| 400 | A2B8C12 |  |  |  | 2.658   |
| 401 | A2B8C13 |  |  |  | 4.026   |
| 402 | A2B8C14 |  |  |  | 2.207   |
| 403 | A2B8C15 |  |  |  | 15.465  |
| 404 | A2B8C16 |  |  |  | 16.984  |

|     |         |                                                                                     |                                                                                     |                                                                                       |        |
|-----|---------|-------------------------------------------------------------------------------------|-------------------------------------------------------------------------------------|---------------------------------------------------------------------------------------|--------|
| 405 | A2B8C17 |    |    |    | 14.828 |
| 406 | A2B8C18 |    |    |    | 0.206  |
| 407 | A2B8C19 |    |    |    | -1.583 |
| 408 | A2B8C20 |    |    |    | -8.487 |
| 409 | A2B8C21 |    |   |    | -3.92  |
| 410 | A2B8C22 |  |  |  | 0.173  |
| 411 | A2B8C23 |  |  |  | 0.415  |
| 412 | A2B8C24 |  |  |  | 5.948  |
| 413 | A2B8C25 |  |  |  | 17.546 |
| 414 | A2B8C26 |  |  |  | 4.2    |
| 415 | A3B1C1  |  |  |  | 4.819  |

|     |         |                                                                                     |                                                                                     |                                                                                       |         |
|-----|---------|-------------------------------------------------------------------------------------|-------------------------------------------------------------------------------------|---------------------------------------------------------------------------------------|---------|
| 416 | A3B1C2  |    |    |    | 6.861   |
| 417 | A3B1C3  |    |    |    | 0.898   |
| 418 | A3B1C4  |    |    |    | 9.207   |
| 419 | A3B1C5  |    |    |    | 4.637   |
| 420 | A3B1C6  |    |    |    | -12.335 |
| 421 | A3B1C7  |    |    |    | -14.177 |
| 422 | A3B1C8  |   |   |   | -7.803  |
| 423 | A3B1C9  |  |  |   | -15.228 |
| 424 | A3B1C10 |  |  |   | -15.037 |
| 425 | A3B1C11 |  |  |   | -13.677 |
| 426 | A3B1C12 |  |  |  | -3.786  |
| 427 | A3B1C13 |  |  |  | -0.417  |
| 428 | A3B1C14 |  |  |  | -2.293  |
| 429 | A3B1C15 |  |  |  | 20.893  |



|     |         |                                                                                     |                                                                                     |                                                                                       |         |
|-----|---------|-------------------------------------------------------------------------------------|-------------------------------------------------------------------------------------|---------------------------------------------------------------------------------------|---------|
| 430 | A3B1C16 |    |    |    | 22.289  |
| 431 | A3B1C17 |    |    |    | 19.886  |
| 432 | A3B1C18 |    |    |    | -4.497  |
| 433 | A3B1C19 |    |    |    | -6.473  |
| 434 | A3B1C20 |    |    |    | -14.718 |
| 435 | A3B1C21 |    |    |    | -9.242  |
| 436 | A3B1C22 |   |   |   | -5.195  |
| 437 | A3B1C23 |  |  |  | -5.196  |
| 438 | A3B1C24 |  |  |  | 0.147   |
| 439 | A3B1C25 |  |  |  | 15.74   |
| 440 | A3B1C26 |  |  |  | -2.816  |
| 441 | A3B2C1  |  |  |  | 6.504   |

|     |         |                                                                                     |                                                                                     |                                                                                       |        |
|-----|---------|-------------------------------------------------------------------------------------|-------------------------------------------------------------------------------------|---------------------------------------------------------------------------------------|--------|
| 442 | A3B2C2  |    |    |    | 8.066  |
| 443 | A3B2C3  |    |    |    | 1.925  |
| 444 | A3B2C4  |    |    |    | 8.71   |
| 445 | A3B2C5  |    |    |    | 4.265  |
| 446 | A3B2C6  |    |    |    | -9.734 |
| 447 | A3B2C7  |    |    |    | -6.809 |
| 448 | A3B2C8  |   |   |   | -7.509 |
| 449 | A3B2C9  |  |  |   | -9.137 |
| 450 | A3B2C10 |  |  |   | -8.134 |
| 451 | A3B2C11 |  |  |   | -7.542 |
| 452 | A3B2C12 |  |  |  | -2.145 |
| 453 | A3B2C13 |  |  |  | -0.072 |
| 454 | A3B2C14 |  |  |  | -1.261 |
| 455 | A3B2C15 |  |  |  | 22.988 |

|     |         |                                                                                     |                                                                                     |                                                                                       |         |
|-----|---------|-------------------------------------------------------------------------------------|-------------------------------------------------------------------------------------|---------------------------------------------------------------------------------------|---------|
| 456 | A3B2C16 |    |    |    | 24.979  |
| 457 | A3B2C17 |    |    |    | 22.851  |
| 458 | A3B2C18 |    |    |    | -2.786  |
| 459 | A3B2C19 |    |    |    | -4.346  |
| 460 | A3B2C20 |    |    |    | -12.727 |
| 461 | A3B2C21 |    |    |    | -5.161  |
| 462 | A3B2C22 |   |   |   | -3.962  |
| 463 | A3B2C23 |  |  |  | -3.902  |
| 464 | A3B2C24 |  |  |  | 0.966   |
| 465 | A3B2C25 |  |  |  | 15.671  |
| 466 | A3B2C26 |  |  |  | -2.611  |
| 467 | A3B3C1  |  |  |  | 2.41    |

|     |         |                                                                                     |                                                                                     |                                                                                       |         |
|-----|---------|-------------------------------------------------------------------------------------|-------------------------------------------------------------------------------------|---------------------------------------------------------------------------------------|---------|
| 468 | A3B3C2  |    |    |    | 4.276   |
| 469 | A3B3C3  |    |    |    | -0.971  |
| 470 | A3B3C4  |    |    |    | 7.075   |
| 471 | A3B3C5  |    |    |    | 1.738   |
| 472 | A3B3C6  |    |   |    | -17.476 |
| 473 | A3B3C7  |  |  |  | -7.229  |
| 474 | A3B3C8  |  |  |  | -12.642 |
| 475 | A3B3C9  |  |  |   | -17.27  |
| 476 | A3B3C10 |  |  |   | -12.101 |
| 477 | A3B3C11 |  |  |   | -16.018 |
| 478 | A3B3C12 |  |  |  | -6.201  |

|     |         |                                                                                     |                                                                                     |                                                                                       |         |
|-----|---------|-------------------------------------------------------------------------------------|-------------------------------------------------------------------------------------|---------------------------------------------------------------------------------------|---------|
| 479 | A3B3C13 |    |    |    | -4.219  |
| 480 | A3B3C14 |    |    |    | -5.686  |
| 481 | A3B3C15 |    |    |    | 17.898  |
| 482 | A3B3C16 |    |    |    | 19.662  |
| 483 | A3B3C17 |    |   |    | 17.43   |
| 484 | A3B3C18 |  |  |  | -8.114  |
| 485 | A3B3C19 |  |  |  | -9.874  |
| 486 | A3B3C20 |  |  |  | -16.773 |
| 487 | A3B3C21 |  |  |  | -11.537 |
| 488 | A3B3C22 |  |  |  | -8.126  |
| 489 | A3B3C23 |  |  |  | -8.485  |

|     |         |                                                                                     |                                                                                     |                                                                                       |        |
|-----|---------|-------------------------------------------------------------------------------------|-------------------------------------------------------------------------------------|---------------------------------------------------------------------------------------|--------|
| 490 | A3B3C24 |    |    |    | -3.298 |
| 491 | A3B3C25 |    |    |    | 13.293 |
| 492 | A3B3C26 |    |    |    | -6.81  |
| 493 | A3B4C1  |    |    |    | 6.146  |
| 494 | A3B4C2  |    |    |    | 7.711  |
| 495 | A3B4C3  |  |   |  | 4.794  |
| 496 | A3B4C4  |  |  |  | 11.353 |
| 497 | A3B4C5  |  |  |  | 2.686  |
| 498 | A3B4C6  |  |  |  | -5.957 |
| 499 | A3B4C7  |  |  |  | -8.51  |
| 500 | A3B4C8  |  |  |  | -13.8  |
| 501 | A3B4C9  |  |  |   | -5.177 |
| 502 | A3B4C10 |  |  |   | -5.792 |

|     |         |                                                                                     |                                                                                     |                                                                                       |        |
|-----|---------|-------------------------------------------------------------------------------------|-------------------------------------------------------------------------------------|---------------------------------------------------------------------------------------|--------|
| 503 | A3B4C11 |    |    |     | -5.188 |
| 504 | A3B4C12 |    |    |    | -1.854 |
| 505 | A3B4C13 |    |    |    | -6.052 |
| 506 | A3B4C14 |    |    |    | -2.012 |
| 507 | A3B4C15 |    |    |    | 15.867 |
| 508 | A3B4C17 |    |    |    | 16.179 |
| 509 | A3B4C18 |   |   |   | -4.131 |
| 510 | A3B4C19 |  |  |  | -5.137 |
| 511 | A3B4C20 |  |  |  | -9.367 |
| 512 | A3B4C21 |  |  |  | -2.634 |
| 513 | A3B4C22 |  |  |  | -4.419 |
| 514 | A3B4C23 |  |  |  | -4.661 |
| 515 | A3B4C24 |  |  |  | -0.536 |

|     |         |                                                                                     |                                                                                     |                                                                                       |         |
|-----|---------|-------------------------------------------------------------------------------------|-------------------------------------------------------------------------------------|---------------------------------------------------------------------------------------|---------|
| 516 | A3B4C25 |    |    |    | 12.073  |
| 517 | A3B4C26 |    |    |    | -1.606  |
| 518 | A3B5C1  |    |    |    | 3.274   |
| 519 | A3B5C2  |    |    |    | 4.127   |
| 520 | A3B5C3  |  |   |  | -0.446  |
| 521 | A3B5C4  |  |  |  | 8.214   |
| 522 | A3B5C5  |  |  |  | -0.014  |
| 523 | A3B5C6  |  |  |  | -10.425 |
| 524 | A3B5C7  |  |  |  | -11.29  |



|     |         |                                                                                     |                                                                                     |                                                                                       |         |
|-----|---------|-------------------------------------------------------------------------------------|-------------------------------------------------------------------------------------|---------------------------------------------------------------------------------------|---------|
| 525 | A3B5C8  |    |    |    | -13.026 |
| 526 | A3B5C9  |    |    |     | -9.226  |
| 527 | A3B5C10 |    |    |     | -8.853  |
| 528 | A3B5C11 |    |   |     | -8.316  |
| 529 | A3B5C12 |  |  |  | -4.029  |
| 530 | A3B5C13 |  |  |  | -2.46   |
| 531 | A3B5C14 |  |  |  | -3.633  |
| 532 | A3B5C15 |  |  |  | 21.853  |

|     |         |                                                                                     |                                                                                     |                                                                                       |         |
|-----|---------|-------------------------------------------------------------------------------------|-------------------------------------------------------------------------------------|---------------------------------------------------------------------------------------|---------|
| 533 | A3B5C16 |    |    |    | 23.692  |
| 534 | A3B5C17 |    |    |    | 21.911  |
| 535 | A3B5C18 |    |    |    | -5.432  |
| 536 | A3B5C19 |    |   |    | -7.293  |
| 537 | A3B5C20 |  |  |  | -11.943 |
| 538 | A3B5C21 |  |  |  | -8.197  |
| 539 | A3B5C22 |  |  |  | -6.791  |
| 540 | A3B5C23 |  |  |  | -6.069  |

|     |         |                                                                                     |                                                                                     |                                                                                       |         |
|-----|---------|-------------------------------------------------------------------------------------|-------------------------------------------------------------------------------------|---------------------------------------------------------------------------------------|---------|
| 541 | A3B5C24 |    |    |    | -3.63   |
| 542 | A3B5C25 |    |    |    | 15.434  |
| 543 | A3B5C26 |    |    |    | -5.498  |
| 544 | A3B6C1  |    |    |    | 4.772   |
| 545 | A3B6C2  |  |  |  | 6.824   |
| 546 | A3B6C3  |  |  |  | 0.601   |
| 547 | A3B6C4  |  |  |  | 9.156   |
| 548 | A3B6C5  |  |  |  | 5.496   |
| 549 | A3B6C6  |  |  |  | -14.64  |
| 550 | A3B6C7  |  |  |  | -13.983 |

|     |         |                                                                                     |                                                                                     |                                                                                       |         |
|-----|---------|-------------------------------------------------------------------------------------|-------------------------------------------------------------------------------------|---------------------------------------------------------------------------------------|---------|
| 551 | A3B6C8  |    |    |    | -9.653  |
| 552 | A3B6C9  |    |    |     | -15.627 |
| 553 | A3B6C10 |    |    |     | -15.863 |
| 554 | A3B6C11 |    |    |     | -14.15  |
| 555 | A3B6C12 |    |   |    | -4.737  |
| 556 | A3B6C13 |  |  |  | -0.137  |
| 557 | A3B6C14 |  |  |  | -3.108  |
| 558 | A3B6C15 |  |  |  | 16.455  |
| 559 | A3B6C16 |  |  |  | 18.159  |
| 560 | A3B6C17 |  |  |  | 15.703  |
| 561 | A3B6C18 |  |  |  | -5.366  |

|     |         |                                                                                     |                                                                                     |                                                                                       |         |
|-----|---------|-------------------------------------------------------------------------------------|-------------------------------------------------------------------------------------|---------------------------------------------------------------------------------------|---------|
| 562 | A3B6C19 |    |    |    | -7.355  |
| 563 | A3B6C20 |    |    |    | -15.604 |
| 564 | A3B6C21 |    |    |    | -9.612  |
| 565 | A3B6C22 |    |    |    | -5.284  |
| 566 | A3B6C23 |    |   |   | -5.636  |
| 567 | A3B6C24 |  |  |  | -0.415  |
| 568 | A3B6C25 |  |  |  | 16.693  |
| 569 | A3B6C26 |  |  |  | -3.516  |
| 570 | A3B7C1  |  |  |  | 4.844   |
| 571 | A3B7C2  |  |  |  | 7.12    |

|     |         |                                                                                     |                                                                                     |                                                                                       |         |
|-----|---------|-------------------------------------------------------------------------------------|-------------------------------------------------------------------------------------|---------------------------------------------------------------------------------------|---------|
| 572 | A3B7C3  |    |    |    | 0.147   |
| 573 | A3B7C4  |    |    |    | 9.401   |
| 574 | A3B7C5  |    |    |    | 4.994   |
| 575 | A3B7C6  |    |    |    | -15.416 |
| 576 | A3B7C7  |    |   |    | -14.544 |
| 577 | A3B7C8  |  |  |  | -10.649 |
| 578 | A3B7C9  |  |  |   | -15.451 |
| 579 | A3B7C10 |  |  |   | -15.112 |
| 580 | A3B7C11 |  |  |   | -14.128 |
| 581 | A3B7C12 |  |  |  | -4.977  |
| 582 | A3B7C13 |  |  |  | -1.817  |

|     |         |                                                                                     |                                                                                     |                                                                                       |         |
|-----|---------|-------------------------------------------------------------------------------------|-------------------------------------------------------------------------------------|---------------------------------------------------------------------------------------|---------|
| 583 | A3B7C14 |    |    |    | -3.611  |
| 584 | A3B7C15 |    |    |    | 17.002  |
| 585 | A3B7C16 |    |    |    | 18.835  |
| 586 | A3B7C17 |    |    |    | 16.561  |
| 587 | A3B7C18 |    |   |    | -5.859  |
| 588 | A3B7C19 |  |  |  | -7.99   |
| 589 | A3B7C20 |  |  |  | -15.359 |
| 590 | A3B7C21 |  |  |  | -9.595  |
| 591 | A3B7C22 |  |  |  | -6.455  |
| 592 | A3B7C23 |  |  |  | -6.415  |
| 593 | A3B7C24 |  |  |  | -0.866  |

|     |         |                                                                                     |                                                                                     |                                                                                       |         |
|-----|---------|-------------------------------------------------------------------------------------|-------------------------------------------------------------------------------------|---------------------------------------------------------------------------------------|---------|
| 594 | A3B7C25 |    |    |    | 17.041  |
| 595 | A3B7C26 |    |    |    | -3.261  |
| 596 | A3B8C1  |    |    |    | 5.171   |
| 597 | A3B8C2  |    |    |    | 7.168   |
| 598 | A3B8C3  |   |   |   | 0.623   |
| 599 | A3B8C4  |  |  |  | 9.433   |
| 600 | A3B8C5  |  |  |  | 4.43    |
| 601 | A3B8C6  |  |  |  | -15.771 |
| 602 | A3B8C7  |  |  |  | -13.33  |
| 603 | A3B8C8  |  |  |  | -11.301 |



|     |         |                                                                                     |                                                                                     |                                                                                       |         |
|-----|---------|-------------------------------------------------------------------------------------|-------------------------------------------------------------------------------------|---------------------------------------------------------------------------------------|---------|
| 604 | A3B8C9  |    |    |     | -9.96   |
| 605 | A3B8C10 |    |    |     | -10.131 |
| 606 | A3B8C11 |    |    |     | -9.658  |
| 607 | A3B8C12 |    |    |    | -2.711  |
| 608 | A3B8C13 |    |   |    | -2.299  |
| 609 | A3B8C14 |  |  |  | -3.667  |
| 610 | A3B8C15 |  |  |  | 17.934  |
| 611 | A3B8C16 |  |  |  | 19.648  |
| 612 | A3B8C17 |  |  |  | 17.506  |
| 613 | A3B8C18 |  |  |  | -5.969  |
| 614 | A3B8C19 |  |  |  | -7.698  |

|     |         |                                                                                     |                                                                                     |                                                                                       |         |
|-----|---------|-------------------------------------------------------------------------------------|-------------------------------------------------------------------------------------|---------------------------------------------------------------------------------------|---------|
| 615 | A3B8C20 |    |    |    | -14.436 |
| 616 | A3B8C21 |    |    |    | -9.336  |
| 617 | A3B8C22 |    |    |    | -5.82   |
| 618 | A3B8C23 |    |    |    | -6.29   |
| 619 | A3B8C24 |    |   |   | -1.182  |
| 620 | A3B8C25 |  |  |  | 17.669  |
| 621 | A3B8C26 |  |  |  | -3.301  |

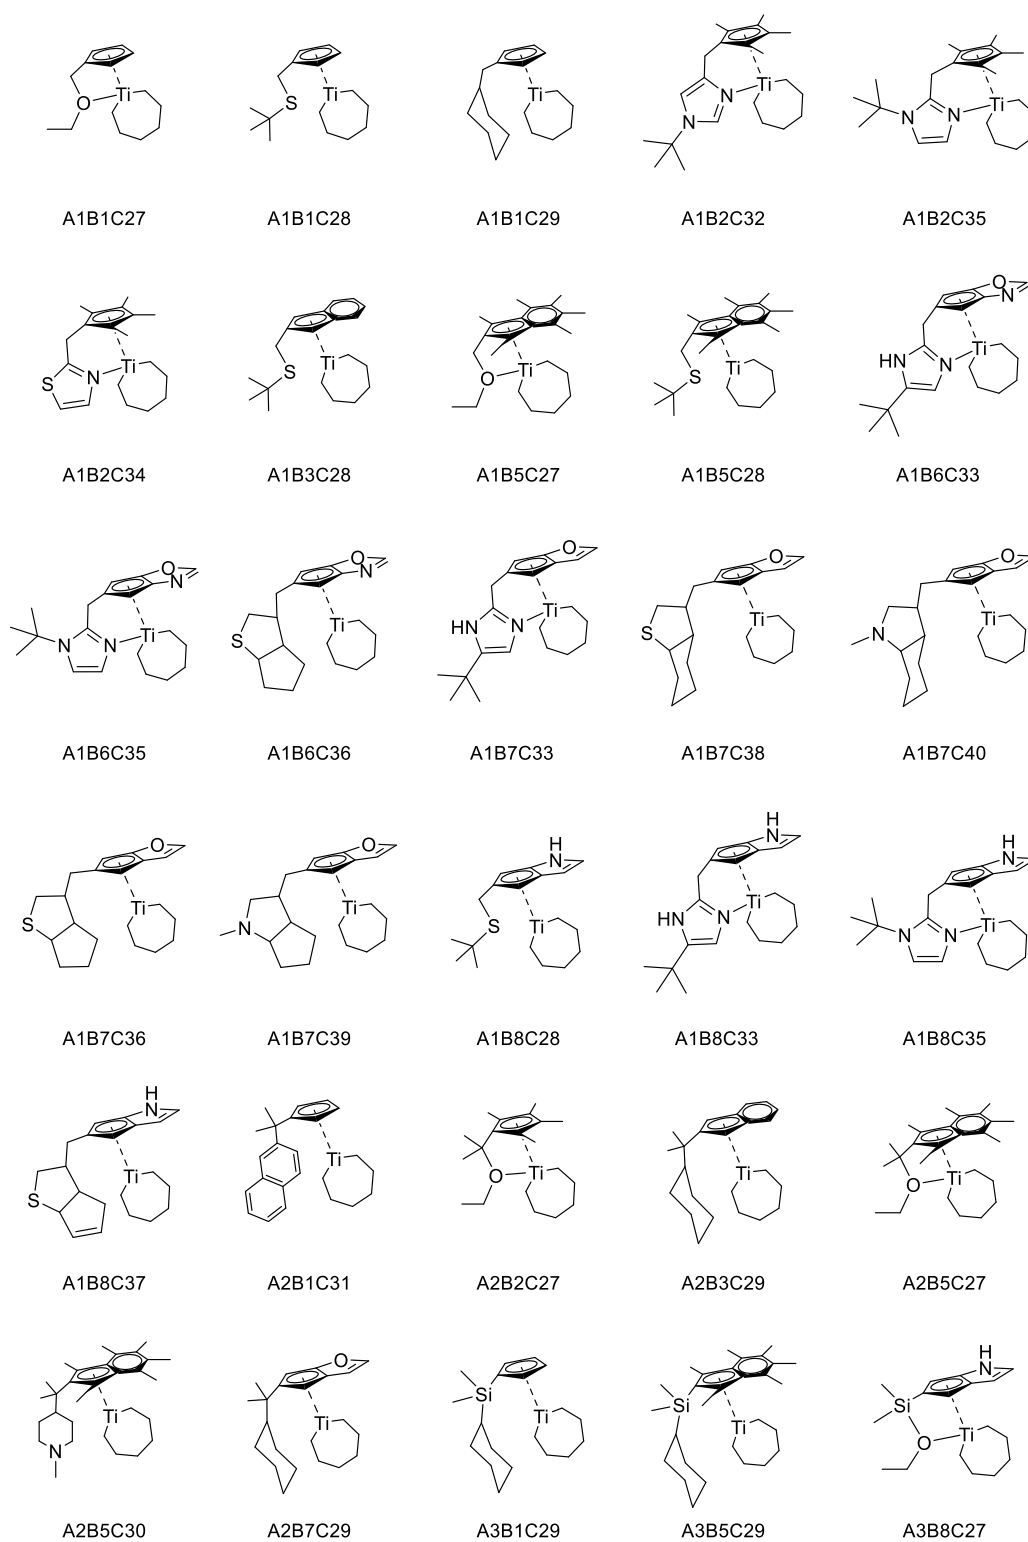

**Figure S1.** Different ligand structure catalysts intermediates in the external validation set.

**Table S3.** The energy barrier difference  $\Delta\Delta G$  of the external validation set.  $\Delta\Delta G$  equals the fourth ethylene insertion energy barrier  $\Delta G_{\text{ethylene insertion}}$  minus the  $\beta$ -hydrogen transfer (after the third ethylene insertion) energy barrier  $\Delta G_{\beta\text{-H transfer}}$ .

| Index | ID (structures shown in Figure S1) | The energy barrier difference $\Delta\Delta G$<br>(kcal/mol) |
|-------|------------------------------------|--------------------------------------------------------------|
| 1     | A1B1C27                            | -2.066                                                       |
| 2     | A1B1C28                            | 1.008                                                        |
| 3     | A1B1C29                            | -15.508                                                      |
| 4     | A1B2C32                            | 21.240                                                       |
| 5     | A1B2C34                            | 19.946                                                       |
| 6     | A1B2C35                            | 21.037                                                       |
| 7     | A1B3C28                            | 0.246                                                        |
| 8     | A1B5C27                            | 0.051                                                        |
| 9     | A1B5C28                            | 3.803                                                        |
| 10    | A1B6C33                            | 15.009                                                       |
| 11    | A1B6C35                            | 15.543                                                       |
| 12    | A1B6C36                            | -19.597                                                      |
| 13    | A1B7C33                            | 15.766                                                       |
| 14    | A1B7C36                            | -19.578                                                      |
| 15    | A1B7C38                            | -8.128                                                       |
| 16    | A1B7C39                            | -16.767                                                      |
| 17    | A1B7C40                            | -7.053                                                       |
| 18    | A1B8C28                            | 1.983                                                        |
| 19    | A1B8C33                            | 16.988                                                       |
| 20    | A1B8C35                            | 17.688                                                       |
| 21    | A1B8C37                            | -12.518                                                      |
| 22    | A2B1C31                            | 0.987                                                        |
| 23    | A2B2C27                            | 7.535                                                        |
| 24    | A2B3C29                            | -8.386                                                       |
| 25    | A2B5C27                            | 1.496                                                        |
| 26    | A2B5C30                            | -3.086                                                       |
| 27    | A2B7C29                            | -9.971                                                       |
| 28    | A3B1C29                            | -12.694                                                      |
| 29    | A3B5C29                            | -8.745                                                       |
| 30    | A3B8C27                            | 5.326                                                        |
